# Supplementary material for: Co-imaging of the tumor oxygenation and metabolism using electron paramagnetic resonance imaging and 13-C hyperpolarized magnetic resonance imaging before and after irradiation
Source: PubMed Central journal article supplement (PMC5982751; doi:10.18632/oncotarget.25317), 2018-05-18
Supplement: oncotarget-09-25089-s001.pdf [file oncotarget-09-25089-s001.pdf]

## Co-imaging of the tumor oxygenation and metabolism using electron paramagnetic resonance imaging and $^{13}\text{C}$ hyperpolarized magnetic resonance imaging before and after irradiation

### SUPPLEMENTARY MATERIALS

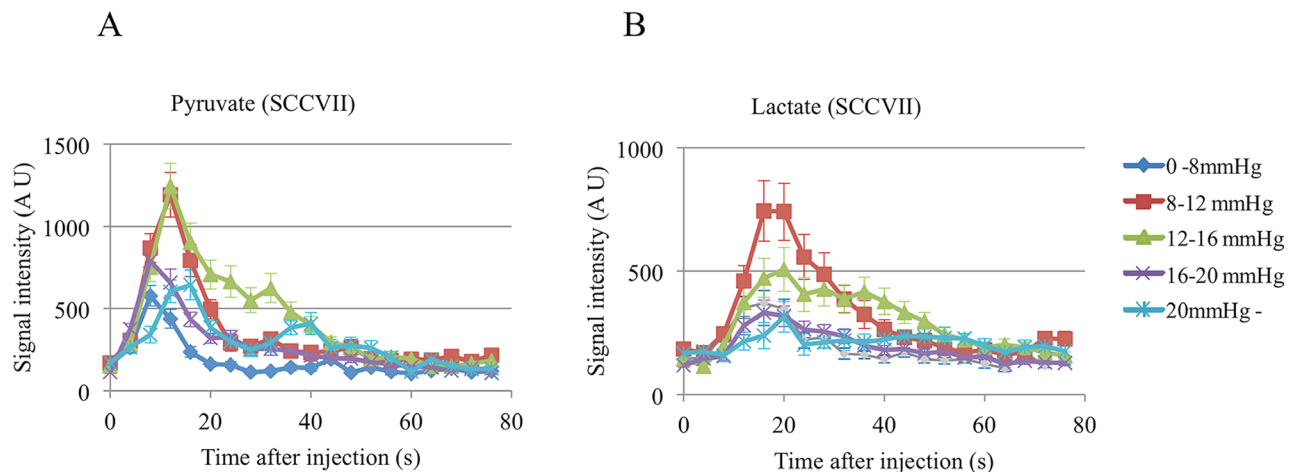

**Supplementary Figure 1:** The time courses of the  $^{13}\text{C}$ -MR signal intensity of  $[1-^{13}\text{C}]$  pyruvate (A) and its metabolic product  $[1-^{13}\text{C}]$  lactate (B) in SCCVII tumor in the five different  $\text{pO}_2$  areas (0–8, 8–12, 12–16, 16–20 and >20 mmHg).

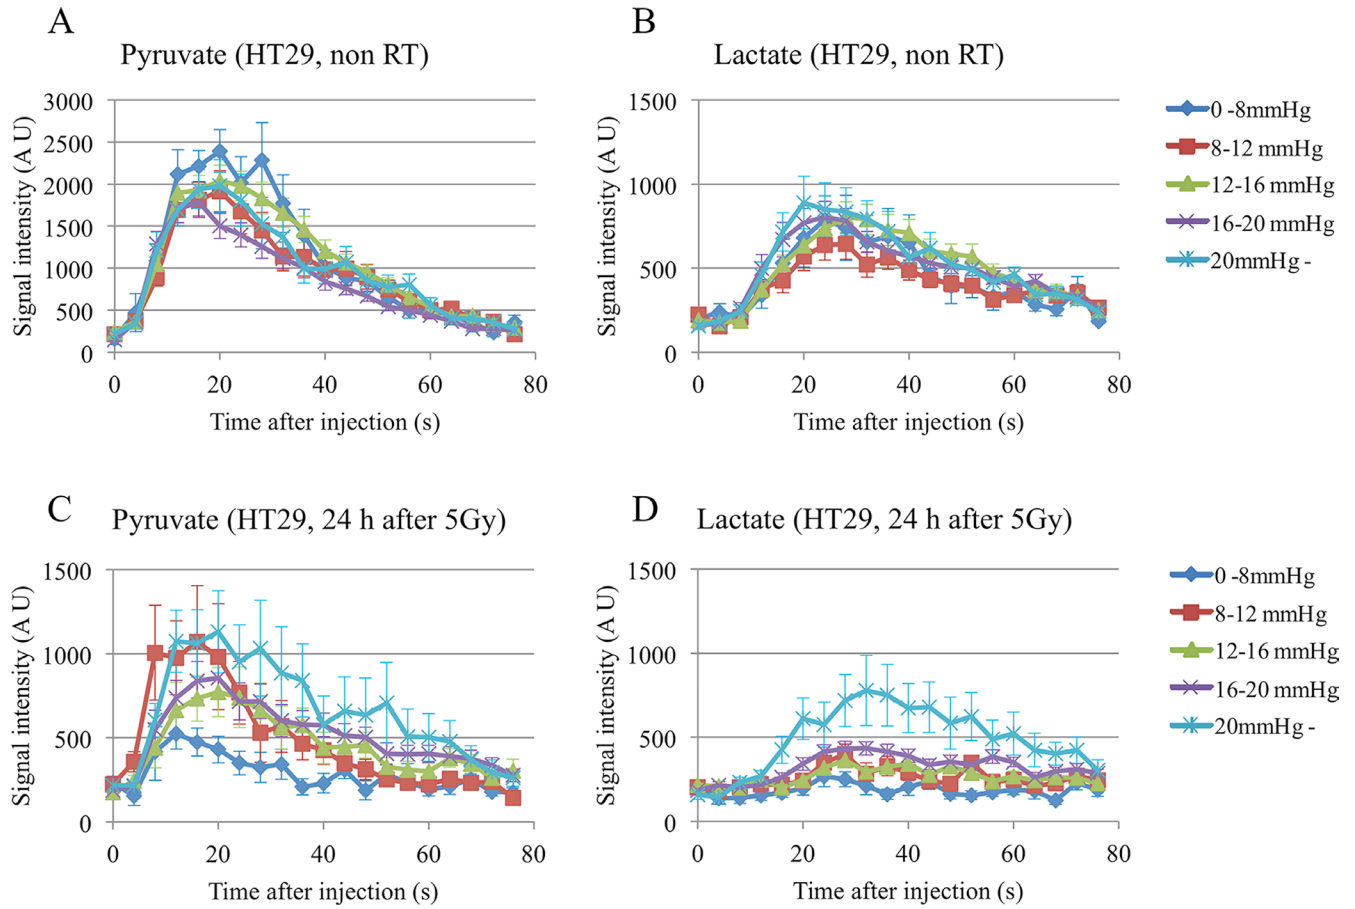

**Supplementary Figure 2:** The time courses of  $^{13}\text{C}$  MR signal intensity of  $[1-^{13}\text{C}]$  pyruvate and its metabolic product  $[1-^{13}\text{C}]$  lactate in non-irradiated HT29 tumor (A and B, respectively) and 5-Gy irradiated HT29 tumor after 24 hour (C and D, respectively) in the five different  $\text{pO}_2$  areas (0–8, 8–12, 12–16, 16–20 and  $>20$  mmHg).

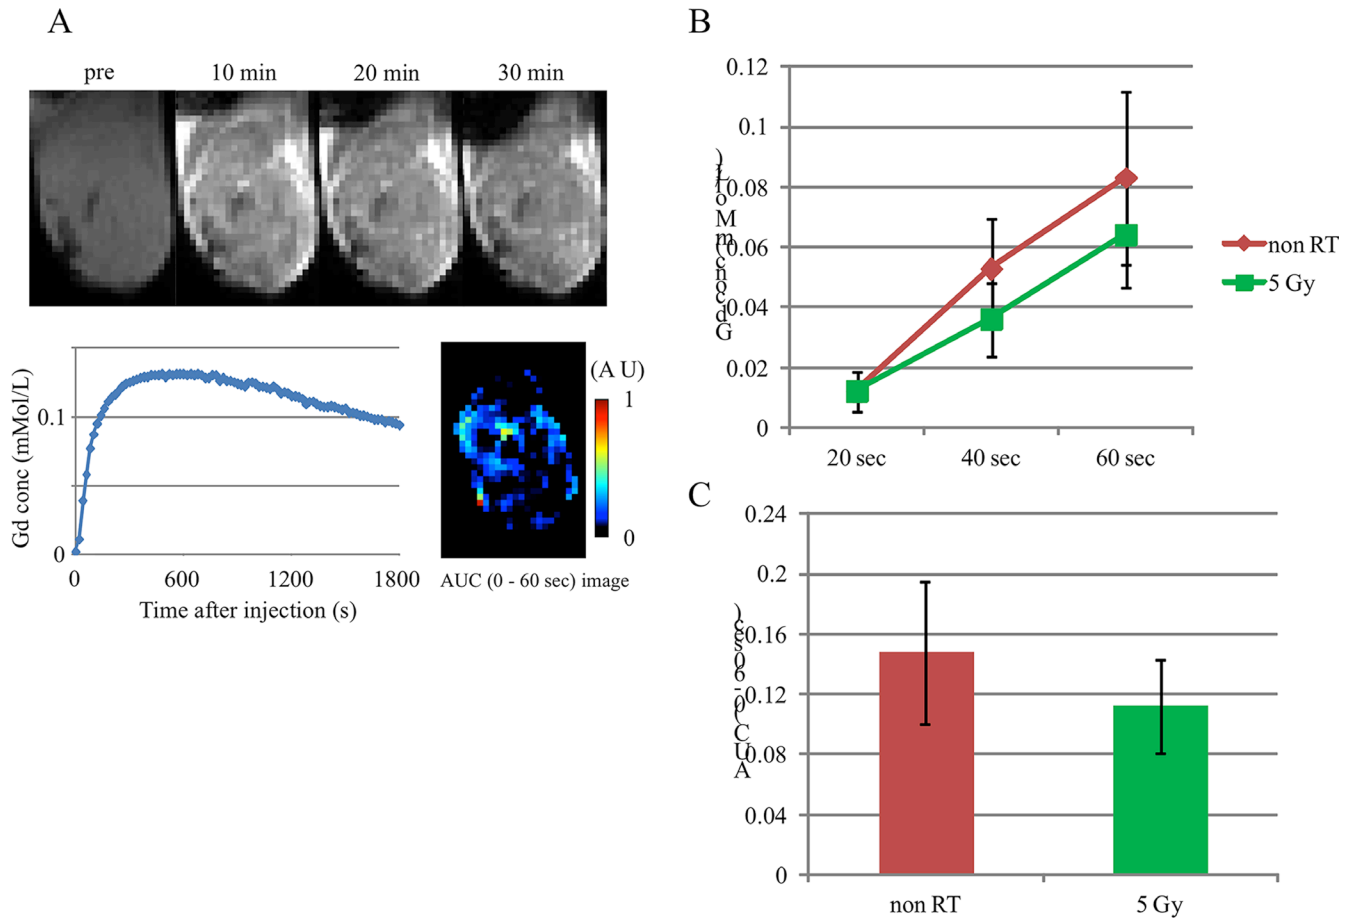

**Supplementary Figure 3: The change in gadolinium concentration: comparison between non-irradiation control and 24 hours after 5-Gy irradiation in HT29 tumor.** (A) A typical case of a dynamic contrast enhanced T1-weighted MR images (pre, 10, 20 and 30 minutes after an injection of gadolinium chelate) along with a dynamic curve of averaged gadolinium concentration in the tumor. (B) A time course of gadolinium concentration in the early phase (0–60 seconds) in non-irradiated HT29 tumors ( $n = 4$ ) and those irradiated with 5-Gy before 24 hours ( $n = 4$ ). (C) AUC of a time course of gadolinium concentration from 0 to 60 seconds in the two groups. The averaged concentration of gadolinium in the irradiated group is significantly lower than that in non-irradiated group (0.112 mmol/L and 0.148 mmol/L, respectively;  $P < 0.05$ ).
